# Supplementary material for: The dissociation of the Fgf-feedback loop controls the limbless state of the neck
Source: Oxford University Press journal article supplement (doi:10.1242/dev.02164), 2005-11-28
Supplement: dev02164supptables.pdf [file dev02164supptables.pdf]

**Table S1. Limb mesoderm plus the covering ectoderm grafted into the neck or the flank**

| Stage of host embryos           | Somite level of the graft along the anteroposterior axis |        |         |          |                             |
|---------------------------------|----------------------------------------------------------|--------|---------|----------|-----------------------------|
|                                 | 5-6 so                                                   | 7-8 so | 9-10 so | 11-14 so | 21-23 so<br>(flank control) |
| HH 10-11 (9-14 so) <i>n</i> =23 | 21                                                       | 6      | 2       | 4        |                             |
| HH 12 (15-17 so) <i>n</i> =53   | 37                                                       | 15     | 1       |          |                             |
| HH 13 (18-20 so) <i>n</i> =91   | 46                                                       | 41     | 4       |          |                             |
| HH 14 (21-23 so) <i>n</i> =19+7 | 8                                                        | 9      | 2       |          | 7                           |

so, somites.

The first column shows the number of embryos operated (*n*) for each stage considered [HH10-11, 12, 13 or 14, according to Hamburger and Hamilton (Hamburger and Hamilton, 1992)]. The number of somites of the embryos for each stage is indicated in parentheses.

The other five columns show the number of embryos operated for each axial level. The beads were grafted next to somites 5-6, 7-8, 9-10, 11-14 (neck level) or 21-23 (flank control).

**Table S2. Limb mesoderm only grafted into the neck or the flank**

| Stage of host embryos           | Somite level of the graft along the anteroposterior axis |        |         |          |                             |
|---------------------------------|----------------------------------------------------------|--------|---------|----------|-----------------------------|
|                                 | 5-6 so                                                   | 7-8 so | 9-10 so | 11-14 so | 21-23 so<br>(flank control) |
| HH 10-11 (9-14 so) <i>n</i> =7  | 2                                                        | 5      |         |          |                             |
| HH 12 (15-17 so) <i>n</i> =30   | 18                                                       | 10     | 1       | 1        |                             |
| HH 13 (18-20 so) <i>n</i> =59   | 21                                                       | 33     | 5       |          |                             |
| HH 14 (21-23 so) <i>n</i> =19+7 | 2                                                        | 6      | 1       |          | 17                          |

so, somites.

The first column shows the number of embryos operated (*n*) for each stage considered [HH10-11, 12, 13 or 14, according to Hamburger and Hamilton (Hamburger and Hamilton, 1992)]. The number of somites of the embryos for each stage is indicated in parentheses.

The other five columns show the number of embryos operated for each axial level. The beads were grafted next to somites 5-6, 7-8, 9-10, 11-14 (neck level) or 21-23 (flank control).

**Table S3. Fgf10 beads grafted into the neck or the flank**

| Stage of host embryos           | Somite level of the graft along the anteroposterior axis |        |         |          |                             |
|---------------------------------|----------------------------------------------------------|--------|---------|----------|-----------------------------|
|                                 | 5-6 so                                                   | 7-8 so | 9-10 so | 11-14 so | 21-23 so<br>(flank control) |
| HH 10-11 (9-14 so) <i>n</i> =4  | 3                                                        |        |         |          |                             |
| HH 12 (15-17 so) <i>n</i> =14   | 6                                                        | 6      | 2       |          |                             |
| HH 13 (18-20 so) <i>n</i> =23   | 9                                                        | 11     | 2       | 1        |                             |
| HH 14 (21-23 so) <i>n</i> =6+17 | 2                                                        | 3      |         | 1        | 17                          |

so, somites.

The first column shows the number of embryos operated (*n*) for each stage considered [HH10-11, 12, 13 or 14, according to Hamburger and Hamilton (Hamburger and Hamilton, 1992)]. The number of somites of the embryos for each stage is indicated in parentheses.

The other five columns show the number of embryos operated for each axial level. The beads were grafted next to somites 5-6, 7-8, 9-10, 11-14 (neck level) or 21-23 (flank control).

**Table S4. Fgf8 beads grafted into the neck or the flank**

| Stage of host embryos           | Somite level of the graft along the anteroposterior axis |        |         |          |                             |
|---------------------------------|----------------------------------------------------------|--------|---------|----------|-----------------------------|
|                                 | 5-6 so                                                   | 7-8 so | 9-10 so | 11-14 so | 21-23 so<br>(flank control) |
| HH 10-11 (9-14 so) <i>n</i> =11 | 5                                                        | 5      | 1       |          |                             |
| HH 12 (15-17 so) <i>n</i> =16   | 7                                                        | 3      | 4       | 2        |                             |
| HH 13 (18-20 so) <i>n</i> =20   | 10                                                       | 8      |         | 2        |                             |
| HH 14 (21-23 so) <i>n</i> =4+18 | 1                                                        | 1      | 2       |          | 18                          |

so, somites.

The first column shows the number of embryos operated (*n*) for each stage considered [HH10-11, 12, 13 or 14, according to Hamburger and Hamilton (Hamburger and Hamilton, 1992)]. The number of somites of the embryos for each stage is indicated in parentheses.

The other five columns show the number of embryos operated for each axial level. The beads were grafted next to somites 5-6, 7-8, 9-10, 11-14 (neck level) or 21-23 (flank control).
